# Supplementary material
Source: Springer Nature journal article supplement (https://www.springermedizin.de/resource/supplementary/12982_2005_18_MOESM1_ESM.pdf/9604274)
Supplement: MOESM1 [file 9604274]

2004

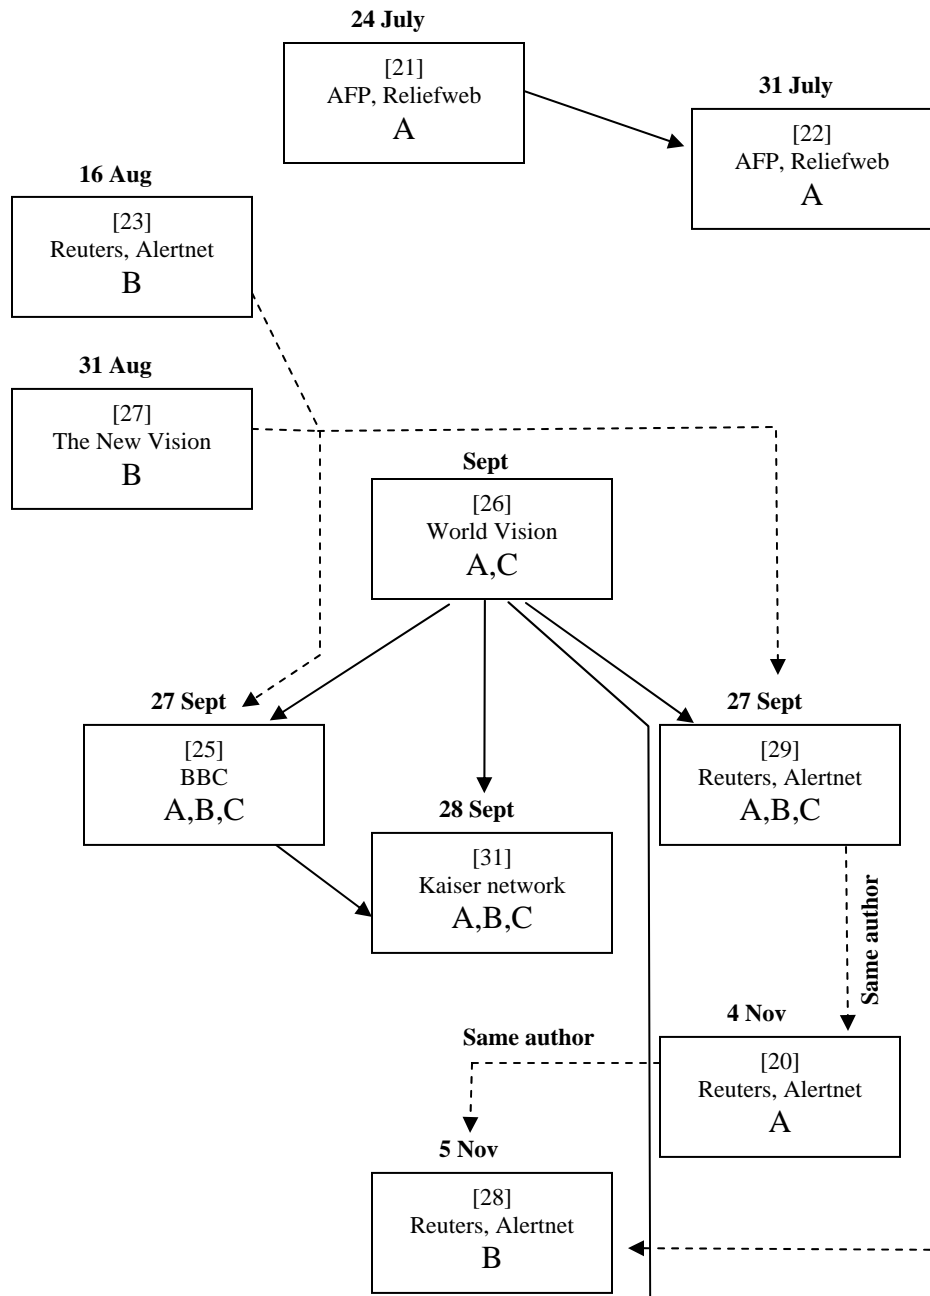

2005

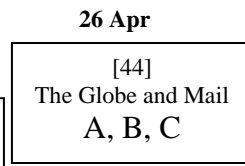

**A:** HIV prevalence in North is double that of the whole country  
**B:** 50% HIV prevalence among ex-abductees  
**C:** AIDS causing 69% of total deaths  
 - - - -: probable cross reference/ source  
 —: source mentioned.
